# Supplementary material for: Effect of PCC crystallization and morphology on flocculation with microfibrillated cellulose, on sheet densification and liquid absorption behavior
Source: Springer Nature journal article supplement (doi:10.1007/s10570-020-03458-2), 2020-10-01
Supplement: MOESM1 [file 18440618]

This file is Online Resource 1 related to *Effect of PCC crystallization and morphology on flocculation with microfibrillated cellulose, on sheet densification and liquid absorption behavior* (Laukala T, Lyytikäinen J, Mielonen K, Backfolk K)

The file contains six figures illustrating filler migration on surface of PCC-MFC composite sheets with increasing calendering. The sheets were prepared using different MFC-to-PCC ratios.

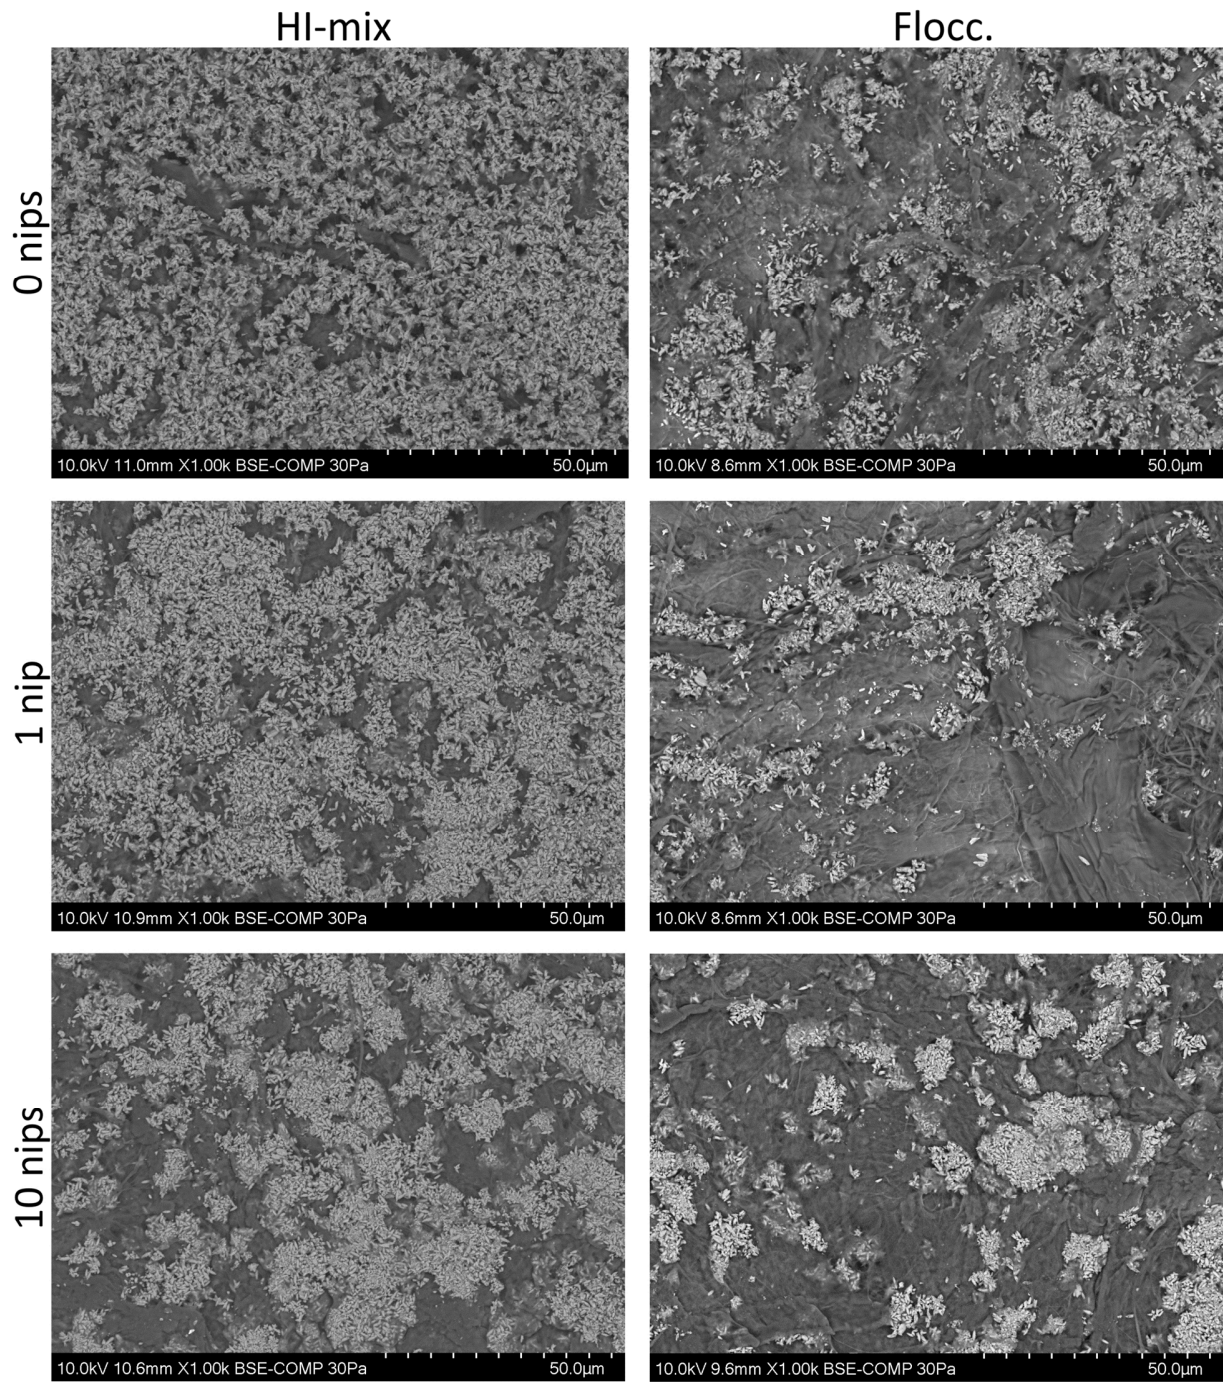

Figure 1 SEM micrographs of the wire side of the calendered samples. **PCC-to-MFC was 1-to-2**. “Flocc” refers to use of flocculating agent (anionic polyacrylamide) and “HI-mix” high intensity mixing during preparation of furnish. Number of nips refers to sample calendering.

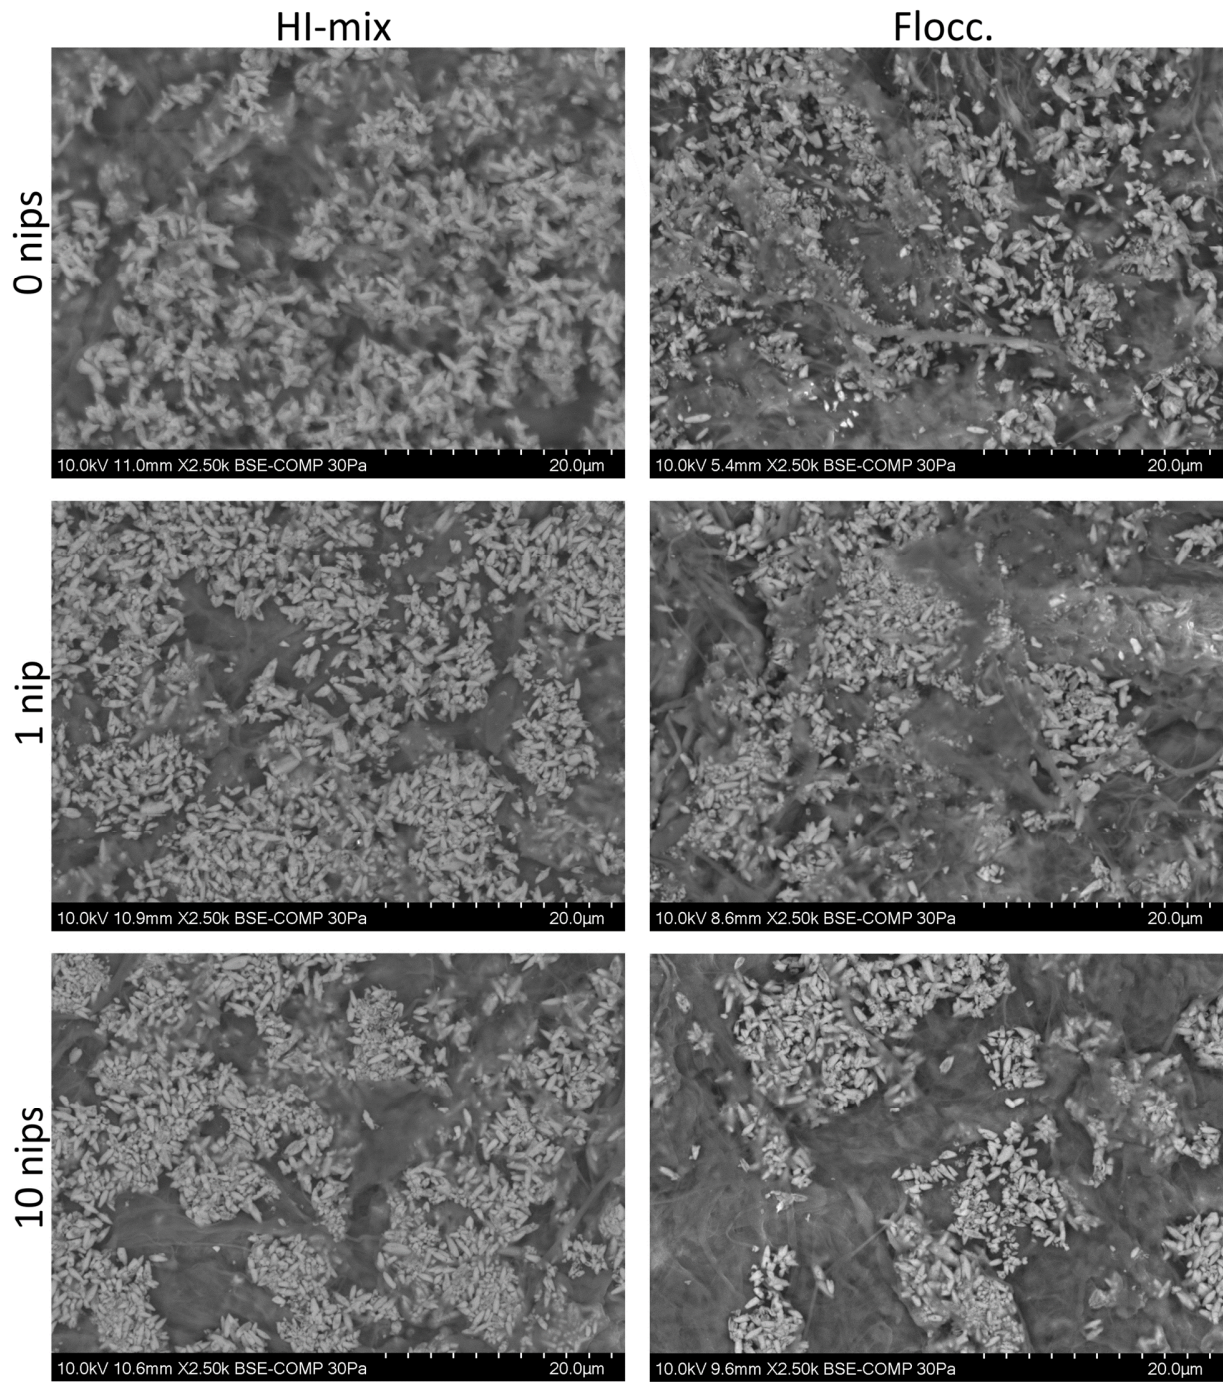

Figure 2 SEM micrographs of the wire side of the calendered samples. **PCC-to-MFC was 1-to-2**. “Flocc” refers to use of flocculating agent (anionic polyacrylamide) and “HI-mix” high intensity mixing during preparation of furnish. Number of nips refers to sample calendering.

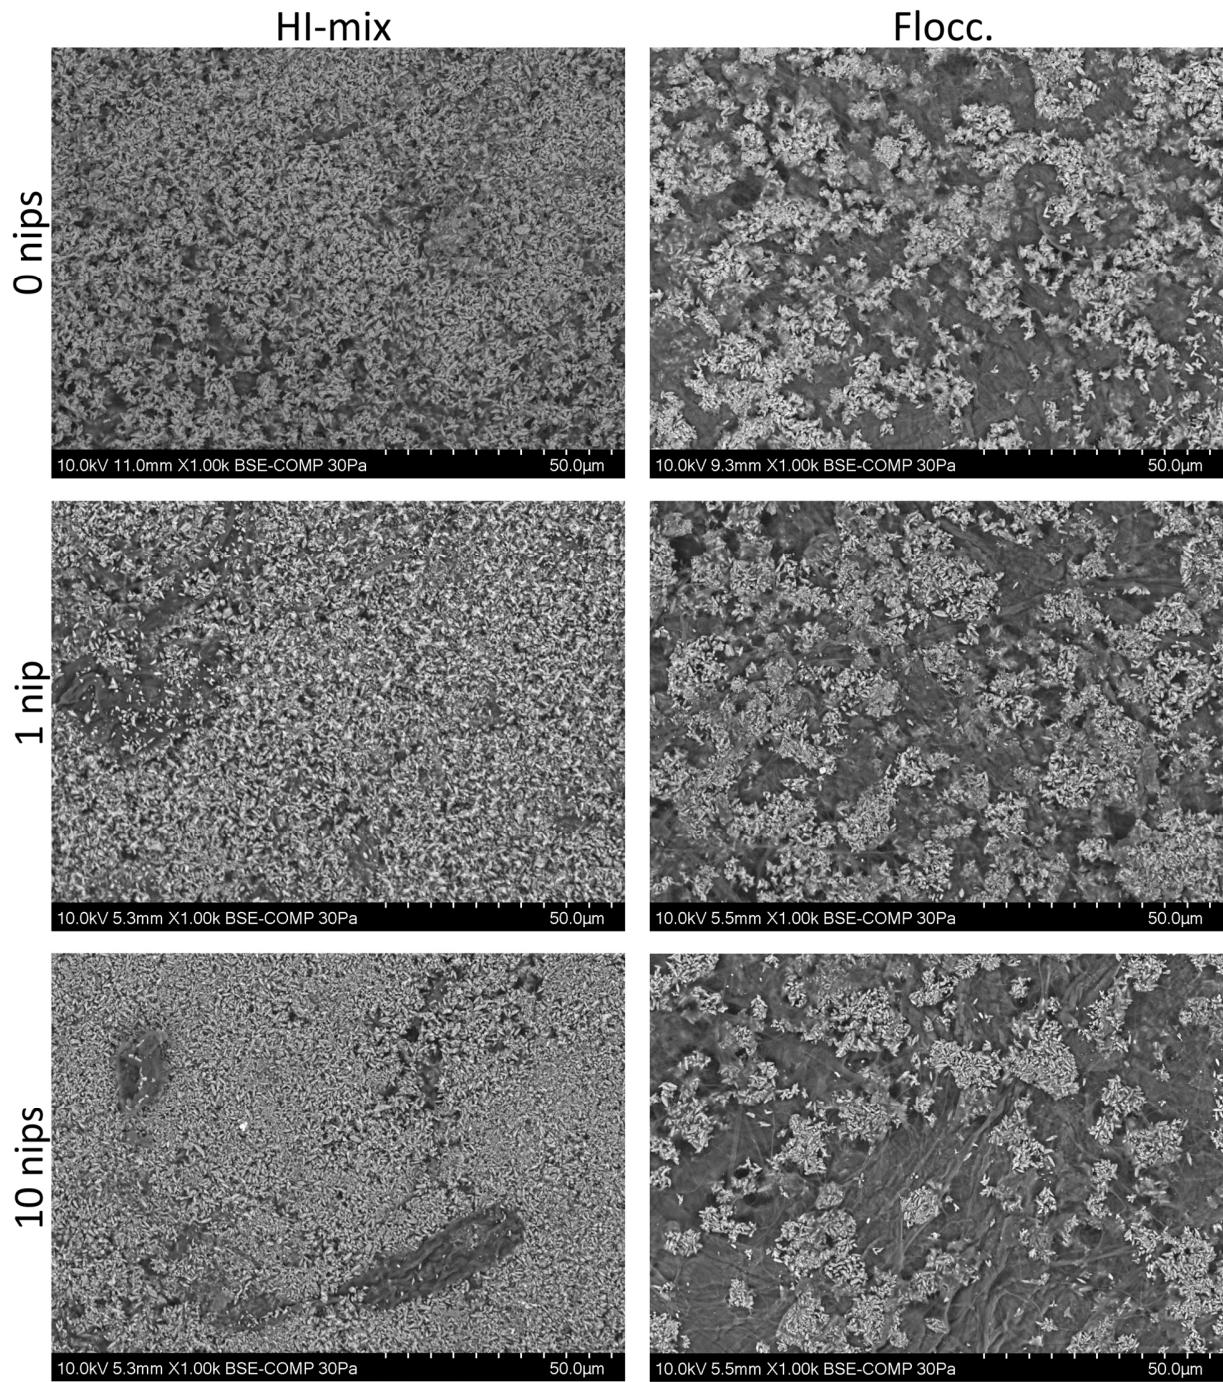

Figure 3 SEM micrographs of the wire side of the calendered samples. **PCC-to-MFC was 1-to-1.** “Flocc” refers to use of flocculating agent (anionic polyacrylamide) and “HI-mix” high intensity mixing during preparation of furnish. Number of nips refers to sample calendering.

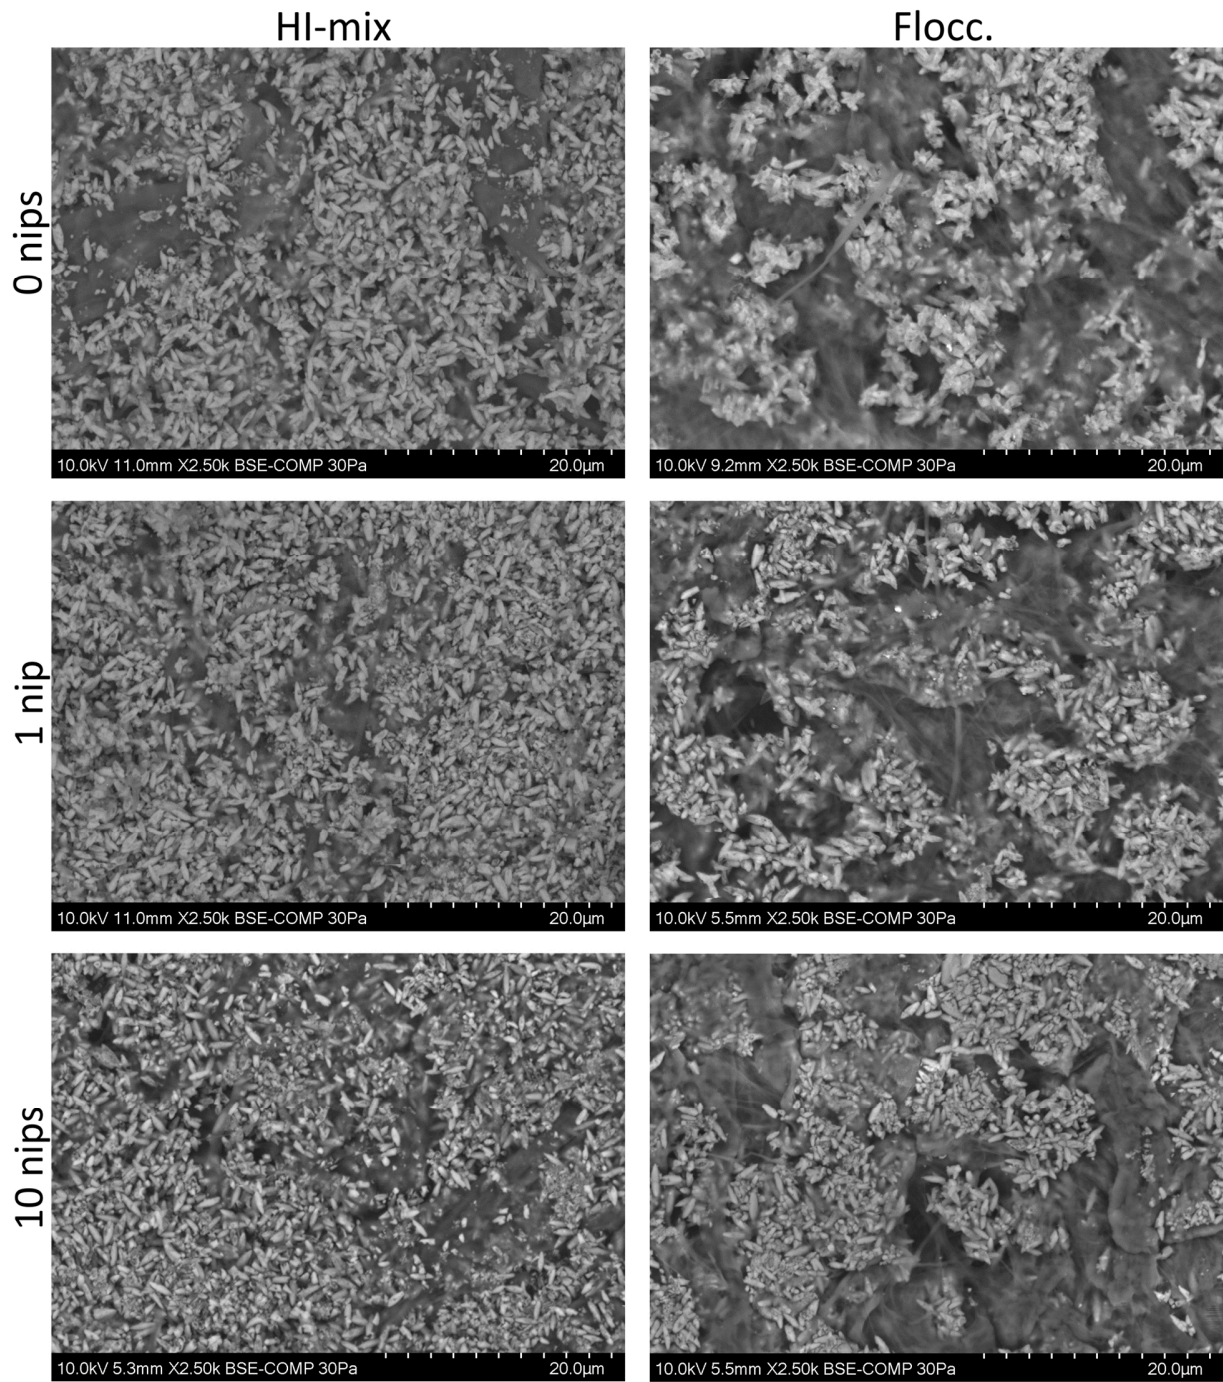

Figure 4 SEM micrographs of the wire side of the calendered samples. **PCC-to-MFC was 1-to-1**. “Flocc” refers to use of flocculating agent (anionic polyacrylamide) and “HI-mix” high intensity mixing during preparation of furnish. Number of nips refers to sample calendering.

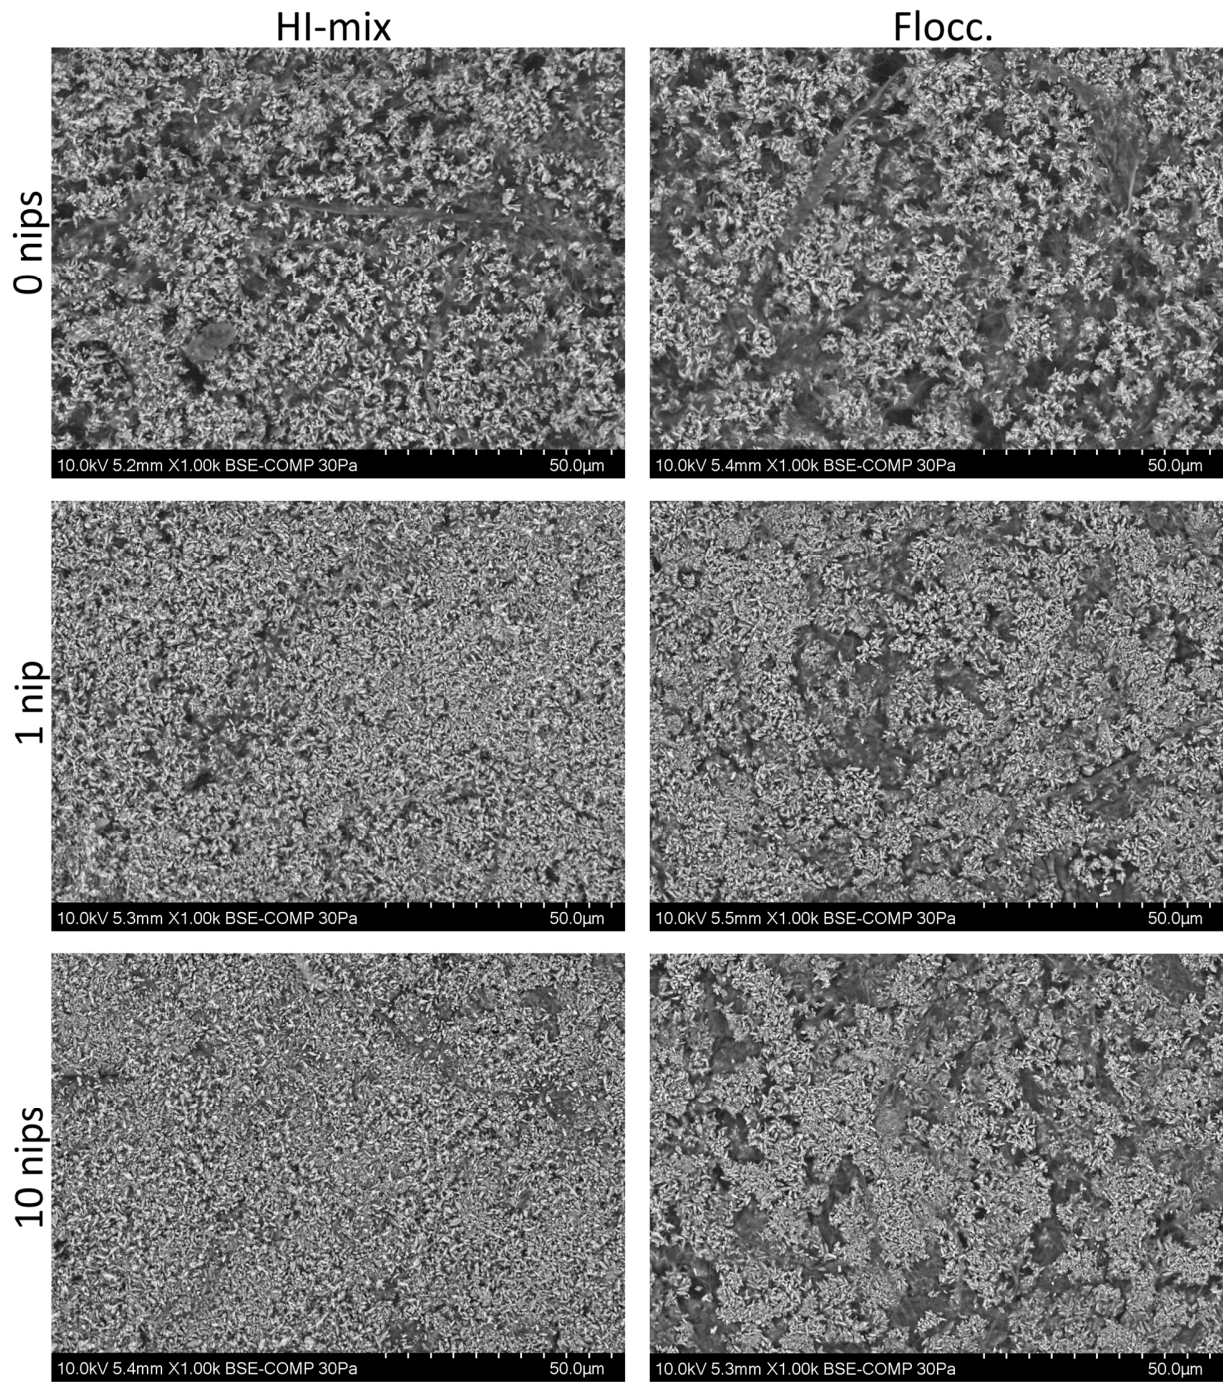

Figure 5 SEM micrographs of the wire side of the calendered samples. **PCC-to-MFC was 2-to-1**. “Flocc” refers to use of flocculating agent (anionic polyacrylamide) and “HI-mix” high intensity mixing during preparation of furnish. Number of nips refers to sample calendering.

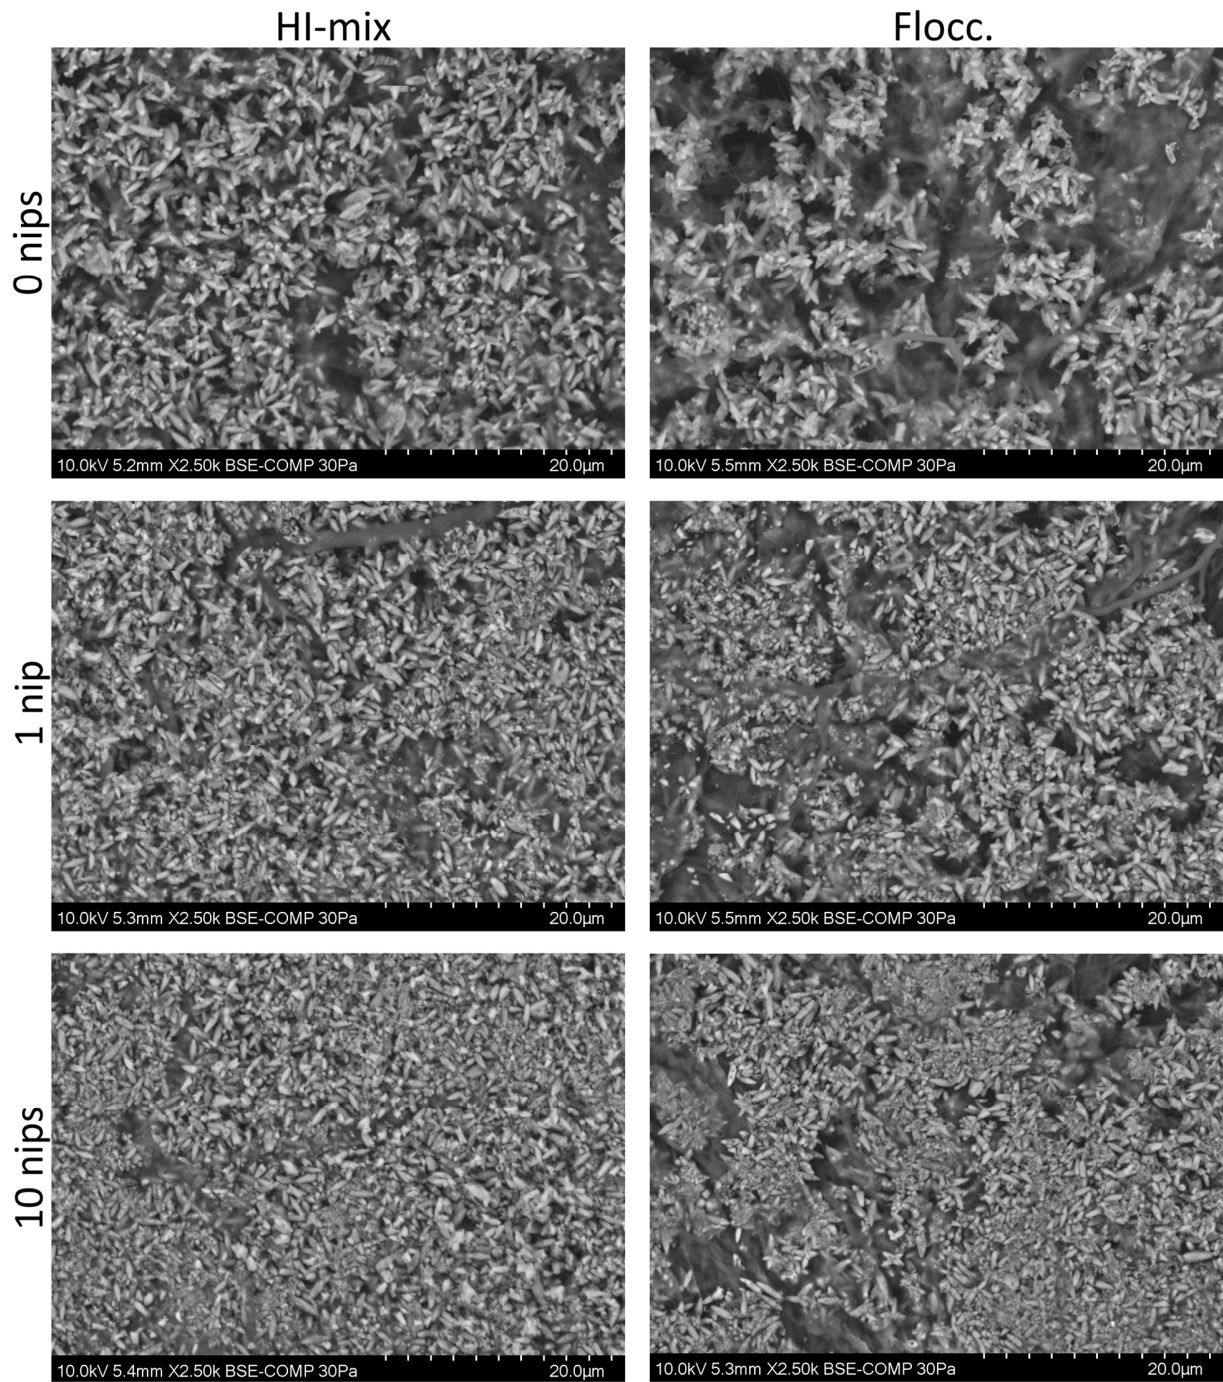

Figure 6 SEM micrographs of the wire side of the calendered samples. **PCC-to-MFC was 2-to-1**. “Flocc” refers to use of flocculating agent (anionic polyacrylamide) and “HI-mix” high intensity mixing during preparation of furnish. Number of nips refers to sample calendering.
